# Supplementary material for: Unexpected radical polymerization behavior of oligo(2-ethyl-2-oxazoline) macromonomers
Source: Royal Society of Chemistry journal article supplement (doi:10.1039/c2py20479g), 2012-01-01
Supplement: c2py20479g.pdf [file c2py20479g.pdf]

# Unexpected radical polymerization behavior of oligo(2-ethyl-2-oxazoline) macromonomers

Christine Weber, Krzysztof Babiuch, Sarah Rogers, Igor Y. Perevyazko, Richard Hoogenboom\*,  
Ulrich S. Schubert\*

## Supporting information

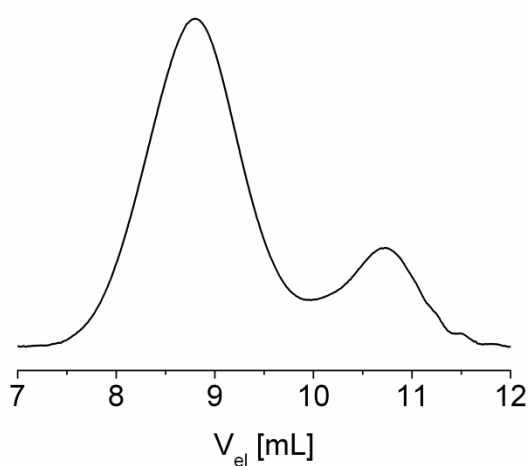

**Figure SI-1:** SEC trace (CHCl<sub>3</sub>, RI detection) from the reaction solution of the FRP of OEtOxA.  $M_n = 6,080 \text{ g mol}^{-1}$ ; PDI = 1.18, conv. = 81%,  $M/AIBN = 240$  (similar to  $M/CTA = 60$  from RAFT),  $[M] = 0.5 \text{ M}$  in EtOH,  $T = 70 \text{ }^\circ\text{C}$ ,  $t = 17.5 \text{ h}$ .

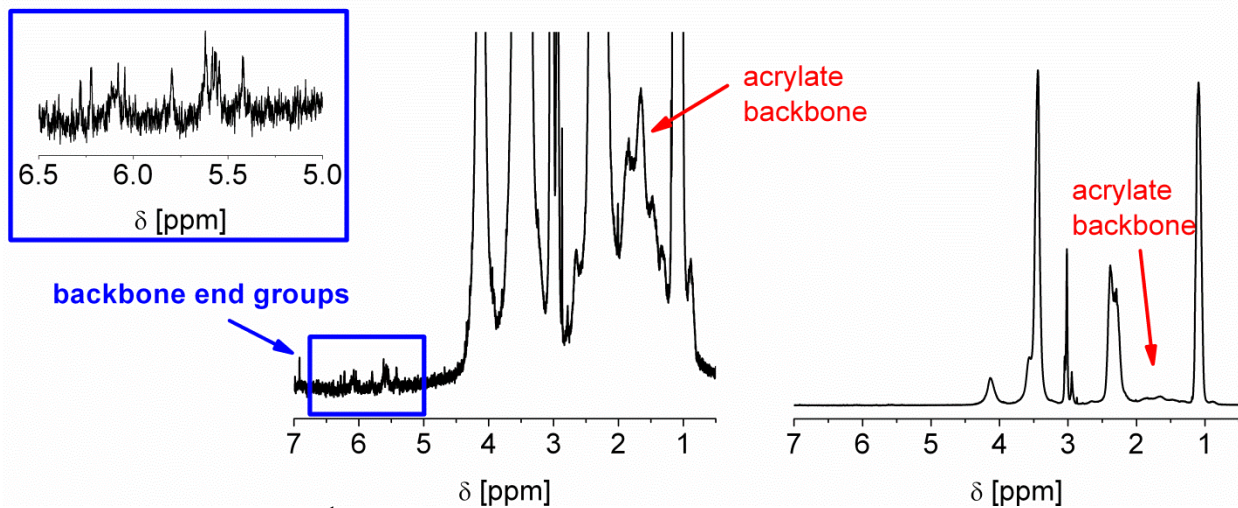

**Figure SI-2:** zoom into the  $^1\text{H}$  NMR spectrum ( $\text{CDCl}_3$ , 300 MHz) of **P3** indicating the presence of vinylic backbone end-groups.

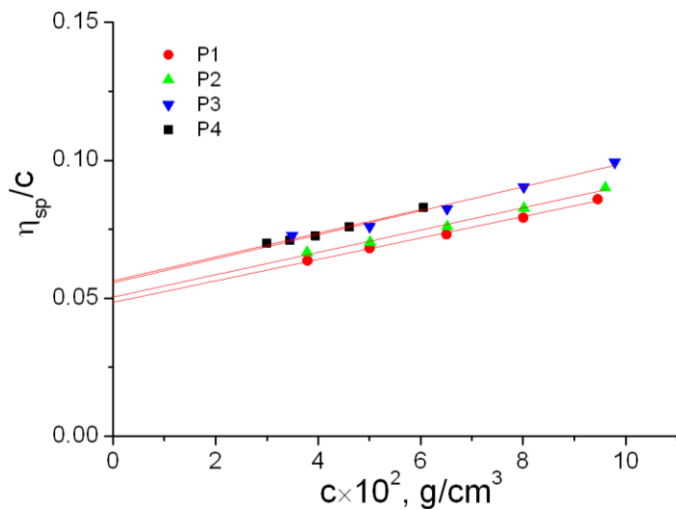

**Figure SI-3.** Dependence of  $\eta_{sp}/c$  on the solute concentration for the determination of the intrinsic viscosity.

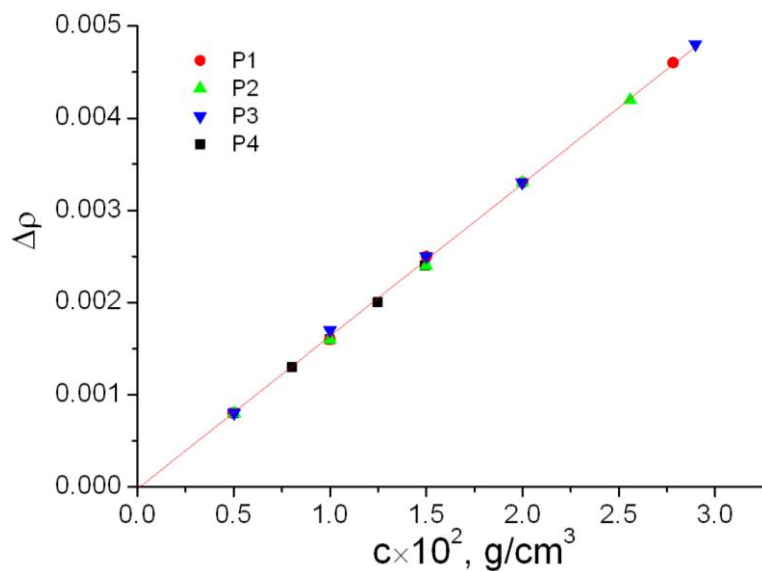

**Figure SI-4.** Dependence of  $\Delta\rho = (\rho - \rho_0)$  on the solute concentration, where  $\rho$  and  $\rho_0$  are the density of the solution and solvent respectively. The slope  $\Delta\rho/\Delta c$  corresponds to the buoyancy factor  $(1 - \nu\rho_0) = 0.166 \pm 0.01$ , which yields  $\nu = 0.835 \pm 0.004 \text{ cm}^3 \cdot \text{g}^{-1}$  for the partial specific volume.

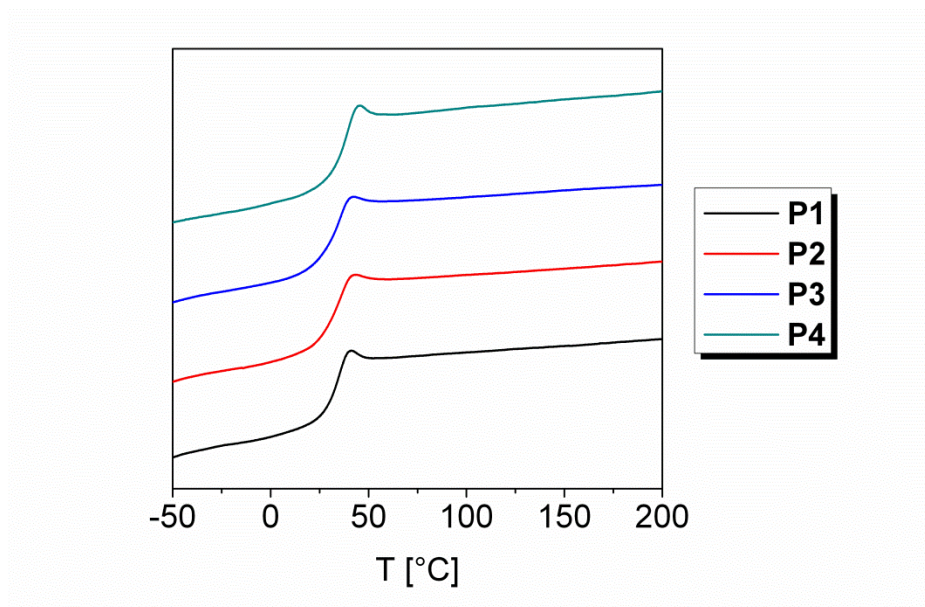

**Figure SI-5:** DSC thermograms of **P1-P4** (second heating run, heating rate  $20 \text{ K min}^{-1}$ ).

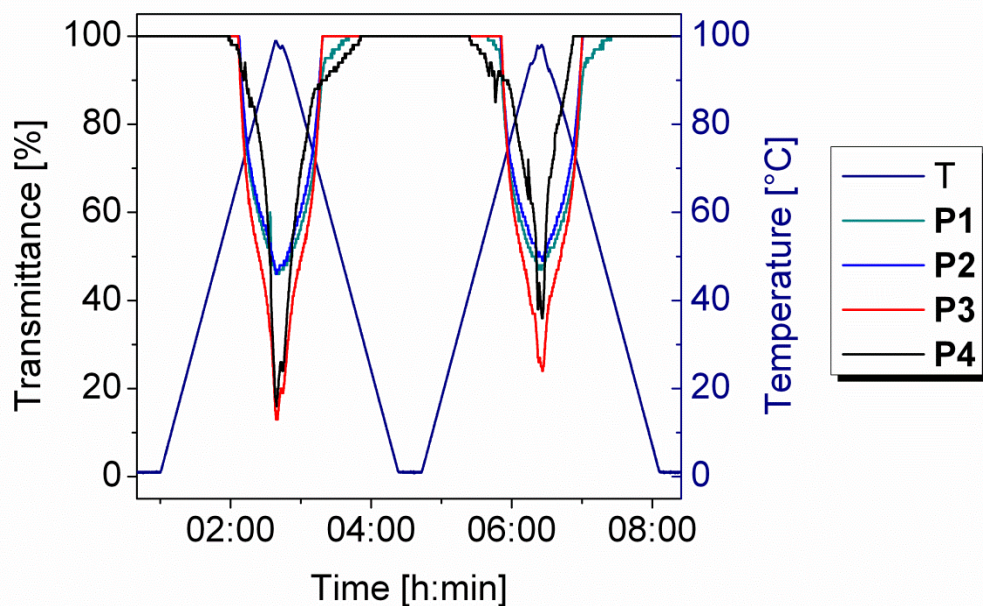

**Figure SI-6:** Turbidity curves of aqueous solutions of POEtOxA **P1-P4** ( $c = 5 \text{ mg mL}^{-1}$ , heating rate  $1 \text{ K min}^{-1}$ ).

**Table SI-1:** Parameters obtained by FISH model fitting of the SANS data for **P1-P4** in  $\text{D}_2\text{O}$ .

|           | Ellipsoid <sup>a</sup> |     |                  | Rod <sup>b</sup> |                | Rod Theo.      |                | Ellipse or Rod? |
|-----------|------------------------|-----|------------------|------------------|----------------|----------------|----------------|-----------------|
|           | $R_1 / \text{Å}$       | X   | $R_2 / \text{Å}$ | $R / \text{Å}$   | $L / \text{Å}$ | $R / \text{Å}$ | $L / \text{Å}$ |                 |
| <b>P1</b> | 7.9                    | 3.9 | 30.8             | 10.2             | 44.5           | 22             | 20             | Rod             |
| <b>P2</b> | 8.6                    | 4.0 | 34.4             | 13.0             | 47.6           | 22             | 37             | Rod             |
| <b>P3</b> | 12.8                   | 3.2 | 41.0             | 12.2             | 60.8           | 22             | 110            | Rod             |
| <b>P4</b> | 15.7                   | 2.6 | 40.8             | 14.2             | 62.1           | 22             | 276            | Rod             |

<sup>a</sup>  $R_1$  and  $R_2$  are the radii of the ellipse, and  $X = R_2/R_1$ .

<sup>b</sup> R corresponds to the radius and L to the length of the rod.

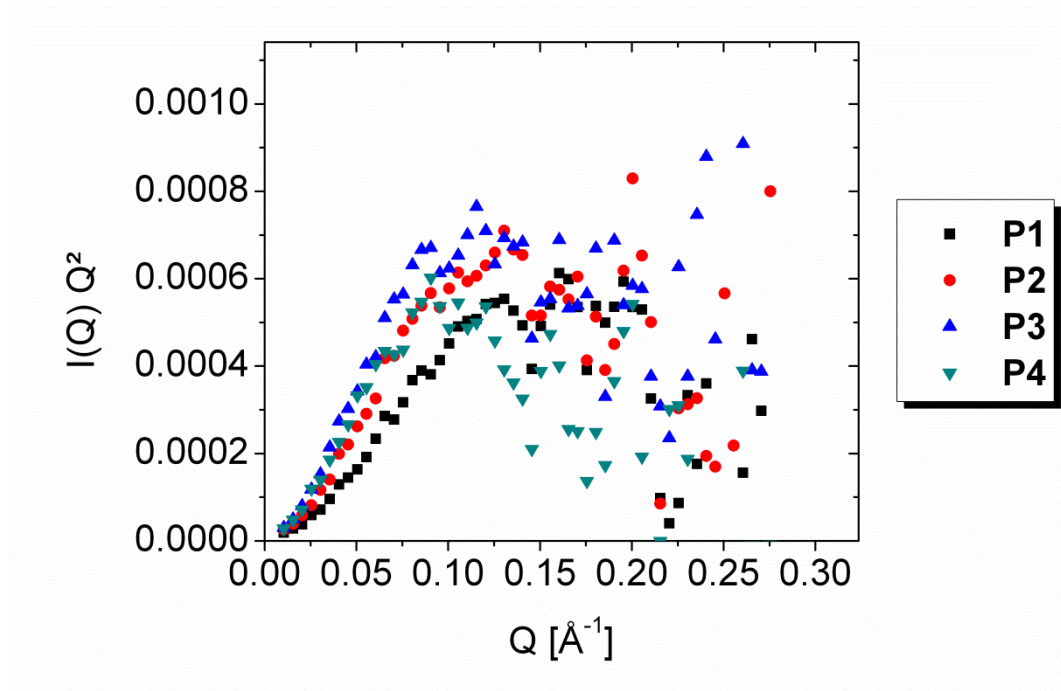

**Figure SI-7:** Kratky plots for SANS data of solutions of **P1-P4** in  $\text{D}_2\text{O}$  ( $c = 5 \text{ mg mL}^{-1}$ ).

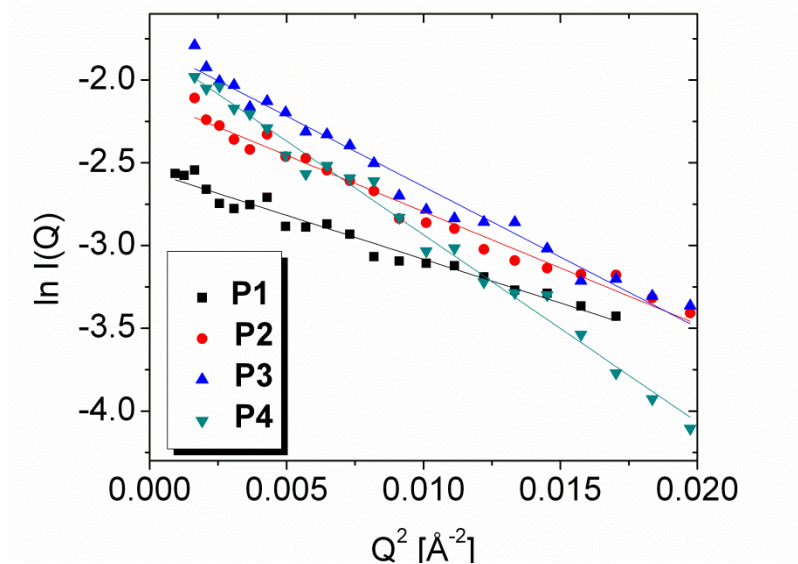

**Figure SI-8:** Guinier plot for SANS data of **P6** in  $\text{D}_2\text{O}$  ( $c = 5 \text{ mg mL}^{-1}$ ). The radius of gyration  $R_g$  is calculated from the slope of the linear fit according to  $R_g = \sqrt{-3 \cdot \text{slope}}$  in the low  $Q$  range.

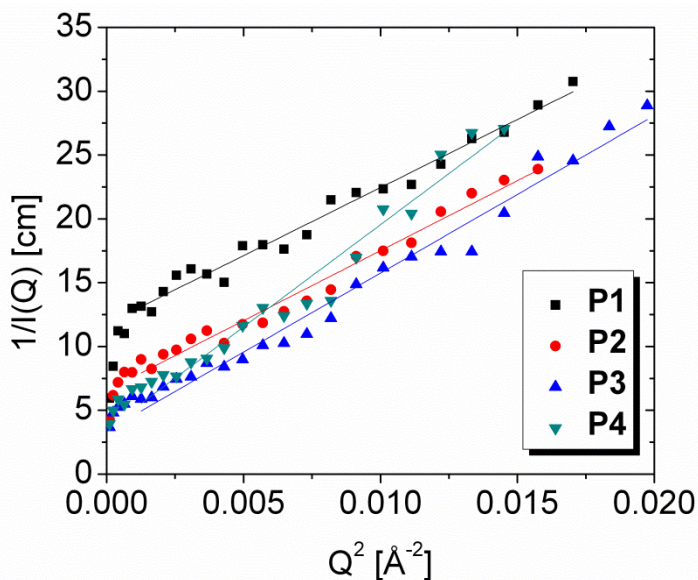

**Figure SI-9:** Zimm plots for SANS data of **P1-P4** in D<sub>2</sub>O ( $c = 5 \text{ mg mL}^{-1}$ ). The correlation length  $\xi$  is obtained from linear fitting according to  $\xi = \sqrt{\text{slope}/\text{intercept}}$  and was used to calculate  $R_g$ .

**Table SI-2.** Radii of gyration ( $R_g$ ) calculated from linear fitting of the Zimm and Guinier plots of the SANS data of **P1-4** in D<sub>2</sub>O.

|           | $I_0 [\text{cm}^{-1}]$ | $\xi [\text{Å}]^a$ | $R_g [\text{Å}]$<br>Zimm<br>(low Q) <sup>b</sup> | $R_g [\text{Å}]$<br>Zimm<br>(high Q) <sup>c</sup> | $R_g [\text{Å}]$<br>Guinier | $R_g [\text{Å}]$<br>cyl. fit <sup>d</sup> | $R_g [\text{Å}]$<br>ell. fit <sup>e</sup> |
|-----------|------------------------|--------------------|--------------------------------------------------|---------------------------------------------------|-----------------------------|-------------------------------------------|-------------------------------------------|
| <b>P1</b> | 0.085                  | 9.5                | 16                                               | 13                                                | 13                          | 14                                        | 15                                        |
| <b>P2</b> | 0.15                   | 13                 | 22                                               | 18                                                | 15                          | 15                                        | 17                                        |
| <b>P3</b> | 0.29                   | 19                 | 33                                               | 27                                                | 17                          | 18                                        | 20                                        |
| <b>P4</b> | 0.28                   | 21                 | 37                                               | 30                                                | 19                          | 18                                        | 21                                        |

<sup>a</sup> correlation length obtained from Zimm analysis.

<sup>b</sup> calculated according to  $R_g = \xi\sqrt{3}$ .

<sup>c</sup> calculated according to  $R_g = \xi\sqrt{2}$ .

<sup>d</sup> calculated according to  $R_g = \sqrt{\frac{L^2}{12} + \frac{R^2}{2}}$  from the cylindrical fit.

<sup>e</sup> calculated according to  $R_g = \sqrt{\frac{2R_1^2 + 2R_2^2}{5}}$  from the ellipsoid fit.
